# Supplementary material for: Thermal biology and swimming performance of Atlantic cod (Gadus morhua) and haddock (Melanogrammus aeglefinus)
Source: PeerJ. 2019 Oct 1;7:e7784. doi: 10.7717/peerj.7784 (PMC6777481; doi:10.7717/peerj.7784)
Supplement: Supplemental Information 1 [file peerj-07-7784-s001.xlsx]

## Sheet: Sheet1
Species	Acclimation temperature ('C)	Fish no.	Body mass (g)	Total length (cm)	Test temperature ('C)	MO2 (mg/h/kg) at test temperature	CTmax ('C)
Cod	8	1	67	20.5	8	139.757	21.7
Cod	8	1	67	20.5	9	149.922	21.7
Cod	8	1	67	20.5	10	218.53	21.7
Cod	8	1	67	20.5	11	198.201	21.7
Cod	8	1	67	20.5	12	188.037	21.7
Cod	8	1	67	20.5	13	200.743	21.7
Cod	8	1	67	20.5	14	203.284	21.7
Cod	8	1	67	20.5	15	231.235	21.7
Cod	8	1	67	20.5	16	243.94	21.7
Cod	8	1	67	20.5	17	256.646	21.7
Cod	8	1	67	20.5	18	264.269	21.7
Cod	8	1	67	20.5	19	279.515	21.7
Cod	8	1	67	20.5	20	284.597	21.7
Cod	8	2	80	21.8	8	106.406	21.2
Cod	8	2	80	21.8	9	134.072	21.2
Cod	8	2	80	21.8	10	117.047	21.2
Cod	8	2	80	21.8	11	140.456	21.2
Cod	8	2	80	21.8	12	140.456	21.2
Cod	8	2	80	21.8	13	225.581	21.2
Cod	8	2	80	21.8	14	204.3	21.2
Cod	8	2	80	21.8	15	231.966	21.2
Cod	8	2	80	21.8	16	204.3	21.2
Cod	8	2	80	21.8	17	259.631	21.2
Cod	8	2	80	21.8	18	266.016	21.2
Cod	8	2	80	21.8	19	278.784	21.2
Cod	8	2	80	21.8	20	257.503	21.2
Cod	8	3	79	22.6	8	142.234	22.9
Cod	8	3	79	22.6	9	116.373	22.9
Cod	8	3	79	22.6	10	135.769	22.9
Cod	8	3	79	22.6	11	146.544	22.9
Cod	8	3	79	22.6	12	157.32	22.9
Cod	8	3	79	22.6	13	165.94	22.9
Cod	8	3	79	22.6	14	198.266	22.9
Cod	8	3	79	22.6	15	213.351	22.9
Cod	8	3	79	22.6	16	206.886	22.9
Cod	8	3	79	22.6	17	221.972	22.9
Cod	8	3	79	22.6	18	249.987	22.9
Cod	8	3	79	22.6	19	254.297	22.9
Cod	8	3	79	22.6	20	256.453	22.9
Cod	8	4	67	20.5	8	167.709	20.8
Cod	8	4	67	20.5	9	203.284	20.8
Cod	8	4	67	20.5	10	213.448	20.8
Cod	8	4	67	20.5	11	243.94	20.8
Cod	8	4	67	20.5	12	231.235	20.8
Cod	8	4	67	20.5	13	259.187	20.8
Cod	8	4	67	20.5	14	284.597	20.8
Cod	8	4	67	20.5	15	294.761	20.8
Cod	8	4	67	20.5	16	310.007	20.8
Cod	8	4	67	20.5	17	299.843	20.8
Cod	8	4	67	20.5	18	269.351	20.8
Cod	8	4	67	20.5	19	292.22	20.8
Cod	8	4	67	20.5	20	284.597	20.8
Cod	8	5	71	22.2	8	244.585	21.2
Cod	8	5	71	22.2	9	213.412	21.2
Cod	8	5	71	22.2	10	206.218	21.2
Cod	8	5	71	22.2	11	206.218	21.2
Cod	8	5	71	22.2	12	194.229	21.2
Cod	8	5	71	22.2	13	218.208	21.2
Cod	8	5	71	22.2	14	223.004	21.2
Cod	8	5	71	22.2	15	261.37	21.2
Cod	8	5	71	22.2	16	263.768	21.2
Cod	8	5	71	22.2	17	278.155	21.2
Cod	8	5	71	22.2	18	290.144	21.2
Cod	8	5	71	22.2	19	290.144	21.2
Cod	8	5	71	22.2	20	268.563	21.2
Cod	8	6	79	22	8	153.009	21.1
Cod	8	6	79	22	9	116.373	21.1
Cod	8	6	79	22	10	140.079	21.1
Cod	8	6	79	22	11	228.437	21.1
Cod	8	6	79	22	12	241.367	21.1
Cod	8	6	79	22	13	260.763	21.1
Cod	8	6	79	22	14	258.608	21.1
Cod	8	6	79	22	15	247.832	21.1
Cod	8	6	79	22	16	280.158	21.1
Cod	8	6	79	22	17	288.778	21.1
Cod	8	6	79	22	18	288.778	21.1
Cod	8	6	79	22	19	299.554	21.1
Cod	8	6	79	22	20	299.554	21.1
Cod	8	7	71	21.5	8	151.067	20.4
Cod	8	7	71	21.5	9	155.863	20.4
Cod	8	7	71	21.5	10	201.423	20.4
Cod	8	7	71	21.5	11	148.669	20.4
Cod	8	7	71	21.5	12	165.454	20.4
Cod	8	7	71	21.5	13	167.852	20.4
Cod	8	7	71	21.5	14	151.067	20.4
Cod	8	7	71	21.5	15	201.423	20.4
Cod	8	7	71	21.5	16	225.401	20.4
Cod	8	7	71	21.5	17	246.982	20.4
Cod	8	7	71	21.5	18	261.37	20.4
Cod	8	7	71	21.5	19	261.37	20.4
Cod	8	7	71	21.5	20	254.176	20.4
Cod	8	8	73	21.9	8	97.9521	21.1
Cod	8	8	73	21.9	9	114.277	21.1
Cod	8	8	73	21.9	10	151.592	21.1
Cod	8	8	73	21.9	11	170.25	21.1
Cod	8	8	73	21.9	12	195.904	21.1
Cod	8	8	73	21.9	13	226.223	21.1
Cod	8	8	73	21.9	14	233.219	21.1
Cod	8	8	73	21.9	15	244.88	21.1
Cod	8	8	73	21.9	16	242.548	21.1
Cod	8	8	73	21.9	17	261.205	21.1
Cod	8	8	73	21.9	18	249.545	21.1
Cod	8	8	73	21.9	19	268.202	21.1
Cod	8	8	73	21.9	20	270.534	21.1
Cod	8	9	70	21.5	8	89.9893	22.3
Cod	8	9	70	21.5	9	89.9893	22.3
Cod	8	9	70	21.5	10	121.607	22.3
Cod	8	9	70	21.5	11	138.632	22.3
Cod	8	9	70	21.5	12	141.064	22.3
Cod	8	9	70	21.5	13	141.064	22.3
Cod	8	9	70	21.5	14	170.25	22.3
Cod	8	9	70	21.5	15	182.411	22.3
Cod	8	9	70	21.5	16	257.807	22.3
Cod	8	9	70	21.5	17	238.35	22.3
Cod	8	9	70	21.5	18	286.993	22.3
Cod	8	9	70	21.5	19	335.636	22.3
Cod	8	9	70	21.5	20	318.611	22.3
Cod	12	1	70	20.7	12	228.621	23.2
Cod	12	1	70	20.7	13	243.214	23.2
Cod	12	1	70	20.7	14	238.35	23.2
Cod	12	1	70	20.7	15		23.2
Cod	12	1	70	20.7	16	240.782	23.2
Cod	12	1	70	20.7	17	228.621	23.2
Cod	12	1	70	20.7	18	243.214	23.2
Cod	12	1	70	20.7	19	243.214	23.2
Cod	12	1	70	20.7	20	255.375	23.2
Cod	12	1	70	20.7	21	301.586	23.2
Cod	12	1	70	20.7	22	306.45	23.2
Cod	12	2	63	20	12	216.19	22.8
Cod	12	2	63	20	13	229.702	22.8
Cod	12	2	63	20	14	227	22.8
Cod	12	2	63	20	15	275.643	22.8
Cod	12	2	63	20	16	305.369	22.8
Cod	12	2	63	20	17	267.536	22.8
Cod	12	2	63	20	18	283.75	22.8
Cod	12	2	63	20	19	278.345	22.8
Cod	12	2	63	20	20	283.75	22.8
Cod	12	2	63	20	21	275.643	22.8
Cod	12	2	63	20	22	275.643	22.8
Cod	12	3	75	21.5	12	145.28	23.6
Cod	12	3	75	21.5	13	206.57	23.6
Cod	12	3	75	21.5	14	231.54	23.6
Cod	12	3	75	21.5	15	263.32	23.6
Cod	12	3	75	21.5	16	279.21	23.6
Cod	12	3	75	21.5	17	261.05	23.6
Cod	12	3	75	21.5	18	288.29	23.6
Cod	12	3	75	21.5	19	301.91	23.6
Cod	12	3	75	21.5	20	286.02	23.6
Cod	12	3	75	21.5	21	286.02	23.6
Cod	12	3	75	21.5	22	290.56	23.6
Cod	12	3	75	21.5	23	288.29	23.6
Cod	12	4	65	21.5	12	222.635	24
Cod	12	4	65	21.5	13	235.731	24
Cod	12	4	65	21.5	14	240.969	24
Cod	12	4	65	21.5	15	240.969	24
Cod	12	4	65	21.5	16	261.923	24
Cod	12	4	65	21.5	17		24
Cod	12	4	65	21.5	18	240.969	24
Cod	12	4	65	21.5	19	259.304	24
Cod	12	4	65	21.5	20	295.973	24
Cod	12	4	65	21.5	21	330.023	24
Cod	12	4	65	21.5	22	335.262	24
Cod	12	4	65	21.5	23	337.881	24
Cod	12	5	67	21	12	249.022	22.4
Cod	12	5	67	21	13	269.351	22.4
Cod	12	5	67	21	14	261.728	22.4
Cod	12	5	67	21	15	264.269	22.4
Cod	12	5	67	21	16	292.22	22.4
Cod	12	5	67	21	17	297.302	22.4
Cod	12	5	67	21	18	297.302	22.4
Cod	12	5	67	21	19	315.09	22.4
Cod	12	5	67	21	20	325.254	22.4
Cod	12	5	67	21	21	320.172	22.4
Cod	12	5	67	21	22	287.138	22.4
Cod	12	6	59	19.5	12	178.907	22.4
Cod	12	6	59	19.5	13	173.136	22.4
Cod	12	6	59	19.5	14	204.877	22.4
Cod	12	6	59	19.5	15	213.534	22.4
Cod	12	6	59	19.5	16	213.534	22.4
Cod	12	6	59	19.5	17	253.932	22.4
Cod	12	6	59	19.5	18	300.102	22.4
Cod	12	6	59	19.5	19	320.301	22.4
Cod	12	6	59	19.5	20	354.928	22.4
Cod	12	6	59	19.5	21	352.042	22.4
Cod	12	6	59	19.5	22	354.928	22.4
Cod	12	7	49	20	12	128.556	24
Cod	12	7	49	20	13	132.031	24
Cod	12	7	49	20	14	145.929	24
Cod	12	7	49	20	15	184.148	24
Cod	12	7	49	20	16	198.046	24
Cod	12	7	49	20	17	239.74	24
Cod	12	7	49	20	18	257.112	24
Cod	12	7	49	20	19	354.398	24
Cod	12	7	49	20	20	361.347	24
Cod	12	7	49	20	21	326.602	24
Cod	12	7	49	20	22	319.653	24
Cod	12	7	49	20	23	330.077	24
Cod	12	8	51	21.7	12	233.676	21.7
Cod	12	8	51	21.7	13	176.926	21.7
Cod	12	8	51	21.7	14	193.618	21.7
Cod	12	8	51	21.7	15	260.382	21.7
Cod	12	8	51	21.7	16	243.691	21.7
Cod	12	8	51	21.7	17	270.397	21.7
Cod	12	8	51	21.7	18	287.088	21.7
Cod	12	8	51	21.7	19	300.441	21.7
Cod	12	8	51	21.7	20	323.809	21.7
Cod	12	8	51	21.7	21	287.088	21.7
Cod	12	9	82	21.7	12	124.573	23.3
Cod	12	9	82	21.7	13		23.3
Cod	12	9	82	21.7	14	157.793	23.3
Cod	12	9	82	21.7	15	161.945	23.3
Cod	12	9	82	21.7	16	168.174	23.3
Cod	12	9	82	21.7	17	186.86	23.3
Cod	12	9	82	21.7	18	205.546	23.3
Cod	12	9	82	21.7	19	244.994	23.3
Cod	12	9	82	21.7	20	261.604	23.3
Cod	12	9	82	21.7	21	284.442	23.3
Cod	12	9	82	21.7	22	267.832	23.3
Cod	12	9	82	21.7	23	282.366	23.3
Haddock	12	1	69	18.5	12	167.783	23.6
Haddock	12	1	69	18.5	13	170.25	23.6
Haddock	12	1	69	18.5	14	170.25	23.6
Haddock	12	1	69	18.5	15	185.054	23.6
Haddock	12	1	69	18.5	16	194.924	23.6
Haddock	12	1	69	18.5	17	202.326	23.6
Haddock	12	1	69	18.5	18	227	23.6
Haddock	12	1	69	18.5	19	234.402	23.6
Haddock	12	1	69	18.5	20	244.272	23.6
Haddock	12	1	69	18.5	21	261.543	23.6
Haddock	12	1	69	18.5	22	305.957	23.6
Haddock	12	1	69	18.5	23	261.543	23.6
Haddock	12	2	65	18	12	178.108	22.9
Haddock	12	2	65	18	13	170.25	22.9
Haddock	12	2	65	18	14	199.062	22.9
Haddock	12	2	65	18	15	217.396	22.9
Haddock	12	2	65	18	16	227.873	22.9
Haddock	12	2	65	18	17	251.446	22.9
Haddock	12	2	65	18	18	275.019	22.9
Haddock	12	2	65	18	19	290.735	22.9
Haddock	12	2	65	18	20	295.973	22.9
Haddock	12	2	65	18	21	324.785	22.9
Haddock	12	2	65	18	22	319.546	22.9
Haddock	12	2	65	18	23	175.488	22.9
Haddock	12	3	62	18.5	12	153.774	24
Haddock	12	3	62	18.5	13	153.774	24
Haddock	12	3	62	18.5	14	164.758	24
Haddock	12	3	62	18.5	15	170.25	24
Haddock	12	3	62	18.5	16	192.218	24
Haddock	12	3	62	18.5	17	203.202	24
Haddock	12	3	62	18.5	18	225.169	24
Haddock	12	3	62	18.5	19	258.121	24
Haddock	12	3	62	18.5	20	263.613	24
Haddock	12	3	62	18.5	21	293.819	24
Haddock	12	3	62	18.5	22	329.516	24
Haddock	12	3	62	18.5	23	340.5	24
Haddock	12	4	60	18.8	12	178.763	25
Haddock	12	4	60	18.8	13	147.55	25
Haddock	12	4	60	18.8	14	161.738	25
Haddock	12	4	60	18.8	15	170.25	25
Haddock	12	4	60	18.8	16	187.275	25
Haddock	12	4	60	18.8	17	195.787	25
Haddock	12	4	60	18.8	18	212.812	25
Haddock	12	4	60	18.8	19	249.7	25
Haddock	12	4	60	18.8	20	244.025	25
Haddock	12	4	60	18.8	21	255.375	25
Haddock	12	4	60	18.8	22	329.15	25
Haddock	12	4	60	18.8	23	354.688	25
Haddock	12	4	60	18.8	24	354.688	25
Haddock	12	5	63	19	12	129.714	25
Haddock	12	5	63	19	13	124.31	25
Haddock	12	5	63	19	14	113.5	25
Haddock	12	5	63	19	15	124.31	25
Haddock	12	5	63	19	16	135.119	25
Haddock	12	5	63	19	17	143.226	25
Haddock	12	5	63	19	18	154.036	25
Haddock	12	5	63	19	19	167.548	25
Haddock	12	5	63	19	20	183.762	25
Haddock	12	5	63	19	21	205.381	25
Haddock	12	5	63	19	22	227	25
Haddock	12	5	63	19	23	310.774	25
Haddock	12	5	63	19	24	289.155	25
Haddock	12	6	59	17.5	12	190.449	24
Haddock	12	6	59	17.5	13	213.534	24
Haddock	12	6	59	17.5	14	219.305	24
Haddock	12	6	59	17.5	15	216.419	24
Haddock	12	6	59	17.5	16	213.534	24
Haddock	12	6	59	17.5	17	256.818	24
Haddock	12	6	59	17.5	18	279.903	24
Haddock	12	6	59	17.5	19	317.415	24
Haddock	12	6	59	17.5	20	366.47	24
Haddock	12	6	59	17.5	21	340.5	24
Haddock	12	6	59	17.5	22	346.271	24
Haddock	12	6	59	17.5	23	300.102	24
Haddock	12	7	64	19.1	12	180.891	24
Haddock	12	7	64	19.1	13	186.211	24
Haddock	12	7	64	19.1	14	194.191	24
Haddock	12	7	64	19.1	15	196.852	24
Haddock	12	7	64	19.1	16	218.133	24
Haddock	12	7	64	19.1	17	218.133	24
Haddock	12	7	64	19.1	18	252.715	24
Haddock	12	7	64	19.1	19	252.715	24
Haddock	12	7	64	19.1	20	324.539	24
Haddock	12	7	64	19.1	21	343.16	24
Haddock	12	7	64	19.1	22	329.859	24
Haddock	12	7	64	19.1	23	335.18	24
Haddock	12	8	73	19.9	12	144.596	22.9
Haddock	12	8	73	19.9	13	163.253	22.9
Haddock	12	8	73	19.9	14	205.233	22.9
Haddock	12	8	73	19.9	15	214.562	22.9
Haddock	12	8	73	19.9	16	207.565	22.9
Haddock	12	8	73	19.9	17	233.219	22.9
Haddock	12	8	73	19.9	18	237.884	22.9
Haddock	12	8	73	19.9	19	305.517	22.9
Haddock	12	8	73	19.9	20	321.842	22.9
Haddock	12	8	73	19.9	21	310.182	22.9
Haddock	12	8	73	19.9	22	286.86	22.9
